# Supplementary material
Source: Springer Nature journal article supplement (https://www.springermedizin.de/resource/supplementary/12936_2007_545_MOESM1_ESM.pdf/9548262)
Supplement: MOESM1 [file 9548262]

*P. ovale* AGAGGAACGATGTGTGTCTAACACAAGGAAGTTTAAGGCCAACACAGGTCTGTGATGTCC 1692  
*P. vivax* AGAGGAACGATGTGTGTCTAACACAAGGAAGTTTAAGGCCAACACAGGTCTGTGATGTCC 1465  
*P. malariae* AGAGGAACGATGTGTGTCTAACACAAGGAAGTTTAAGGCCAACACAGGTCTGTGATGTCC 1903  
*P. falciparum* AGAGGAACATTGTGTGTCTAACACAAGGAAGTTTAAGGCCAACACAGGTCTGTGATGTCC 1065  
 \*\*\*\*\*

*P. ovale* TTAGATGAACTAGGCTGCACGCGTGCTACACTGATATGTATAACGAGTTACTAAAAATAT 1752  
*P. vivax* TTAGATGAACTAGGCTGCACGCGTGCTACACTGATATGTATAACGAGTTATTTAAAATTAC 1525  
*P. malariae* TTAGATGAACTAGGCTGCACGCGTGCTACACTGATATGTATAACGAGTATTTAAAATAT 1963  
*P. falciparum* TTAGATGAACTAGGCTGCACGCGTGCTACACTGATATGTATAACGAGTTTTTAAAATAT 1125  
 \*\*\*\*\*

*P. ovale* A-CTTTTGTAGGGTATTTTATATACTCTTT-----CAAATTGTATAGTTTTCTCCACT 1806  
*P. vivax* G-ATTCAGCT-----TGCTGTTT-----CGTATT-----TTTCTCCACT 1559  
*P. malariae* ATATCTTGTATGTTATACGTATTTCTATATGTATGCATACAAAGAATATATAGTTTGCT 2023  
*P. falciparum* GCTTATATTT---GTATCTTTGCTTATATTT---TGCATACT-----TTTCTCCGCC 1172  
 \* \* \* \* \* \* \* \* \* \*

*P. ovale* GA---AAAGTGTAGGTAATCTTTATCAGTACATATCGTGATGGGGATAGATTATTGCAAT 1863  
*P. vivax* GA---AAAGTGTAGGTAATCTTTATCAGTACATATCGTGATGGGGATAGATTATTGCAAT 1616  
*P. malariae* CACTGAAAGTGTAGGTAATCTTTATCAATATATATCGTGATGGGGATAGATTATTGCAAT 2083  
*P. falciparum* GA---AAGGCGTAGGTAATCTTTATCAATATATATCGTGATGGGGATAGATTATTGCAAT 1229  
 \* \*\* \* \*\*\*\*\*
